# Supplementary material for: Binding of dipeptides and tripeptides containing lysine or arginine by p-sulfonatocalixarenes in water: NMR and microcalorimetric studiesElectronic supplementary information (ESI) available: chemical shifts experienced by different protons of KK, RR, KKK or RRR in the presence of increasing amounts of 14 or 16; heat effects observed upon titration of 14, 16 or 18 by KK, RR, KKK or RRR; COSY and ROESY 2D 1H NMR spectra for 14 complexed with KK or RR. See http://www.rsc.org/suppdata/p2/b1/b109553f/
Source: Royal Society of Chemistry journal article supplement (doi:10.1039/b109553f), 2002-02-05
Supplement: b109553f.pdf [file b109553f.pdf]

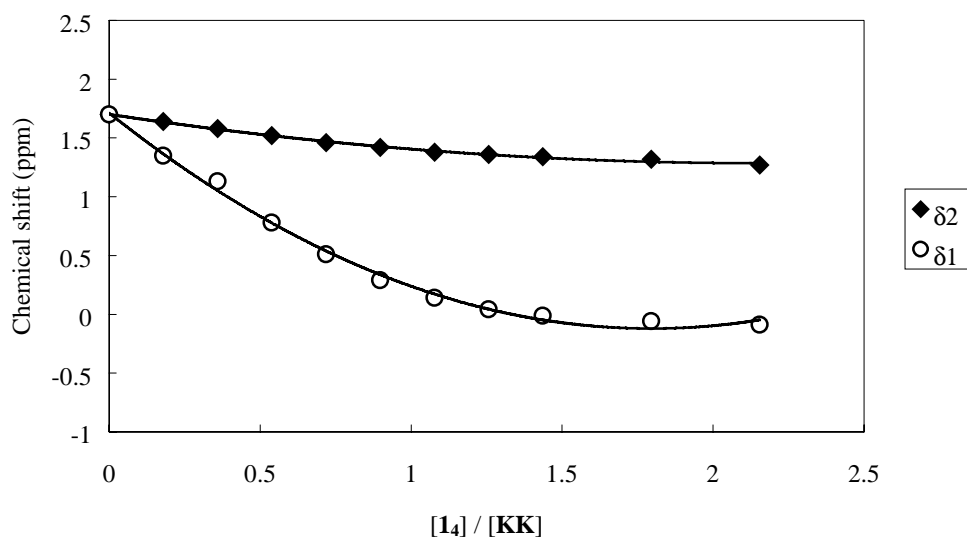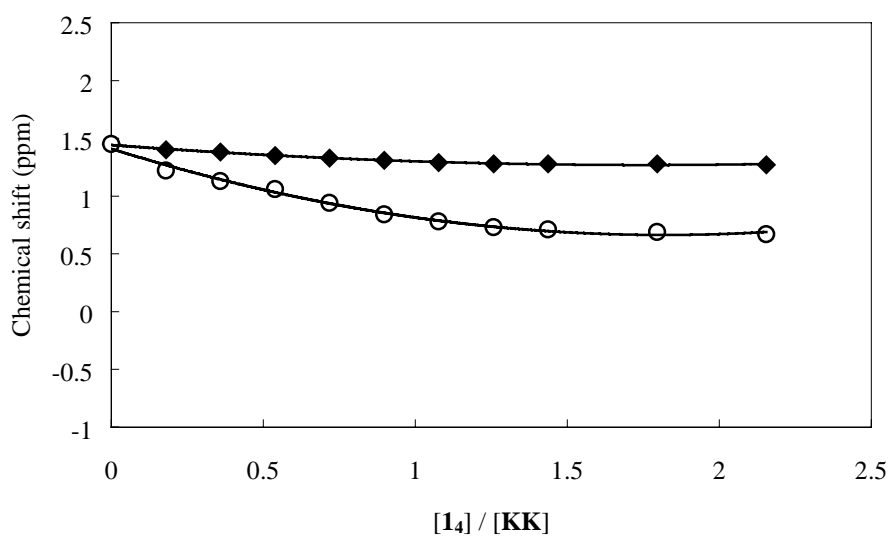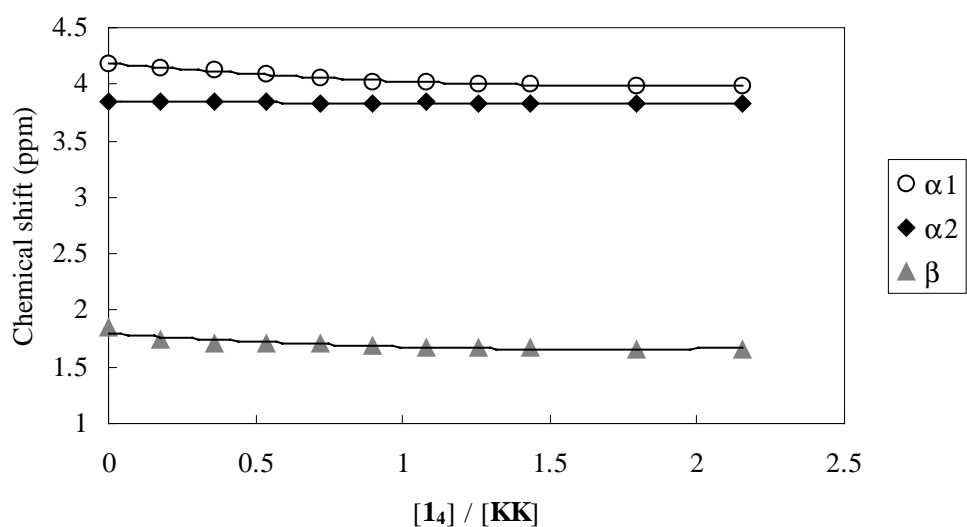

Chemical shifts experienced by the lysine protons of **KK** in the presence of increasing amounts of **14**.

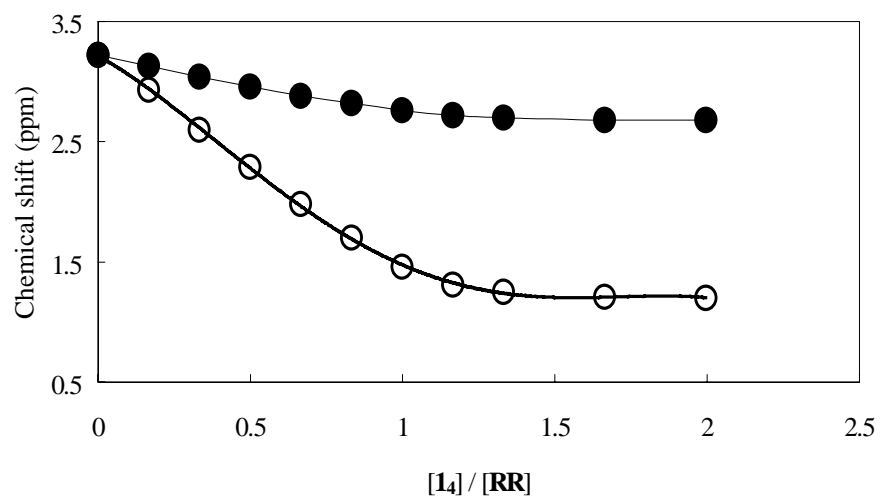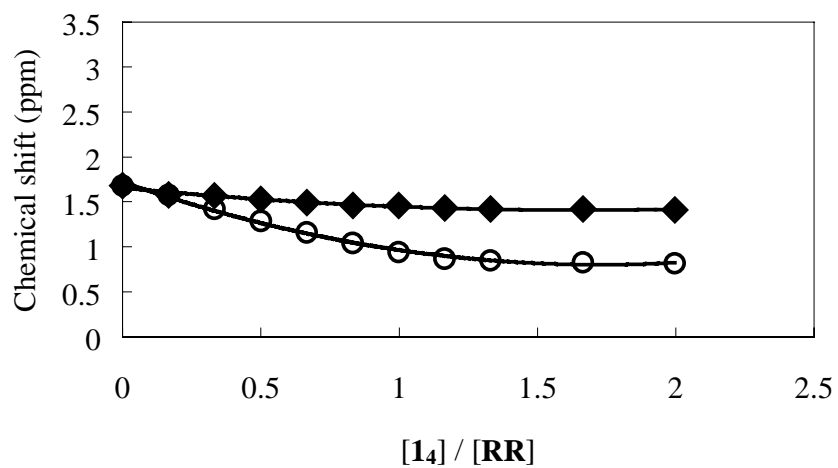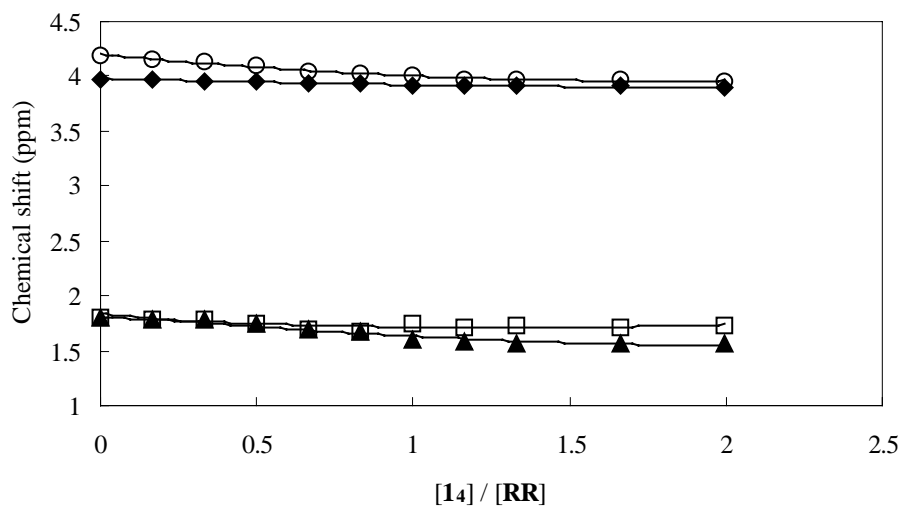

Chemical shifts experienced by the arginine protons of **RR** in the presence of increasing amounts of **14**.

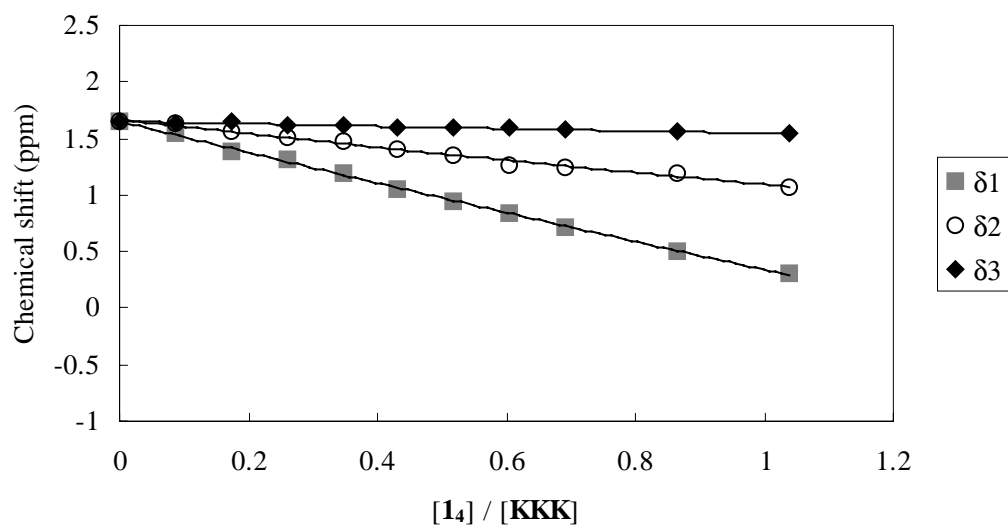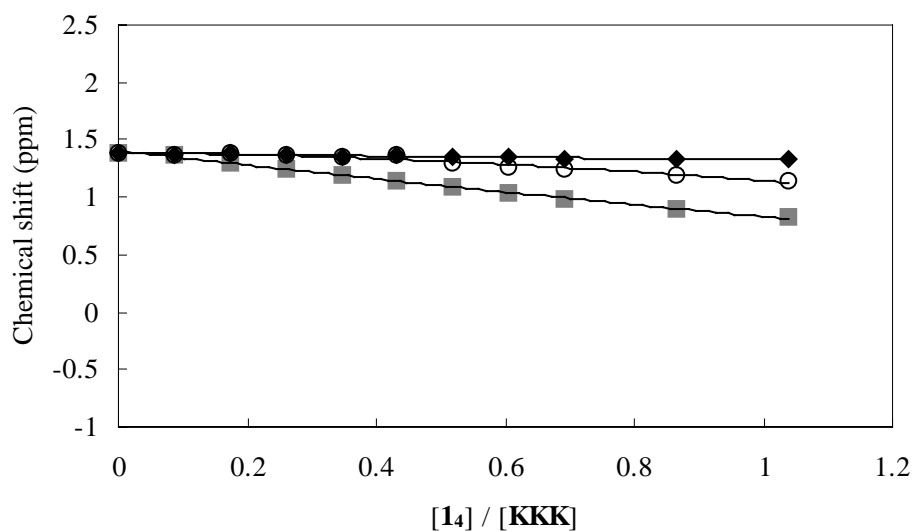

Chemical shifts experienced by the lysine protons of **KKK** in the presence of increasing amounts of **14**.

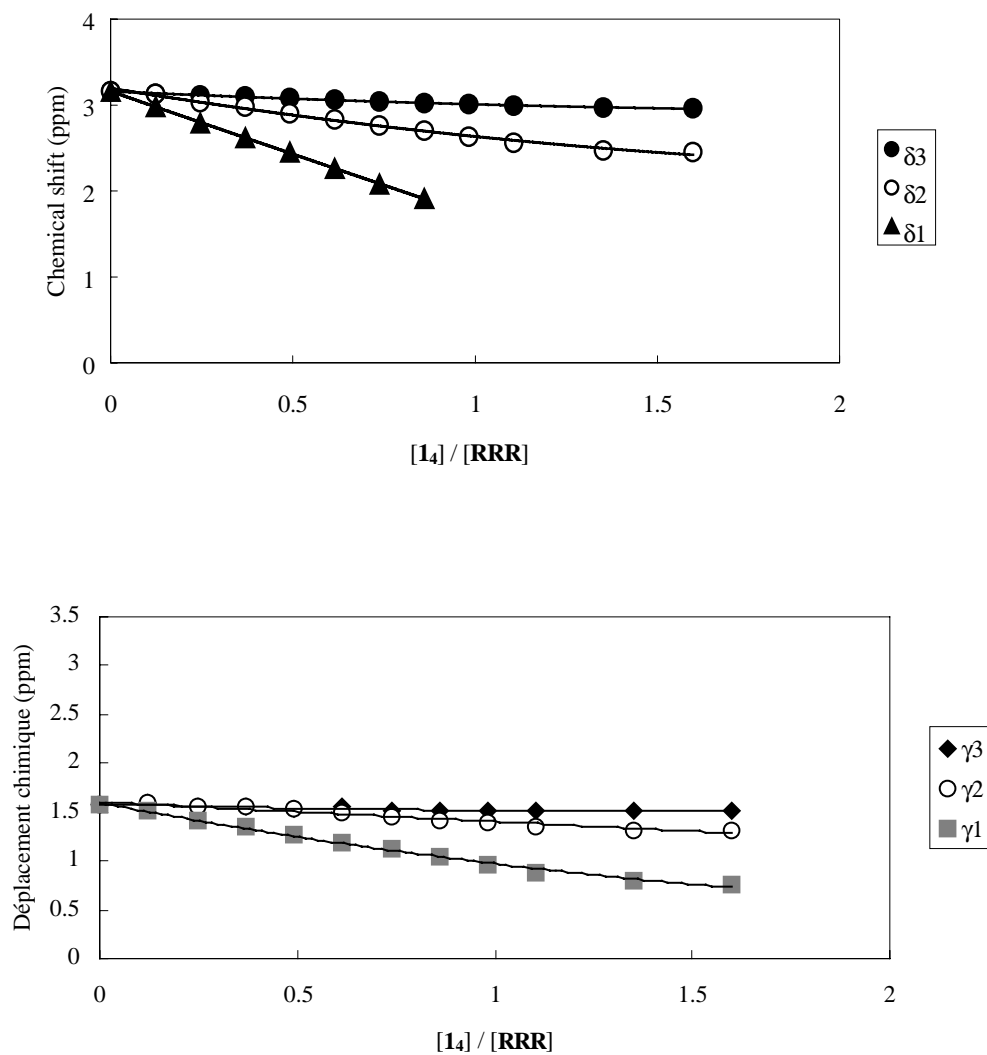

Chemical shifts experienced by the arginine protons of **RRR** in the presence of increasing amounts of **14**.

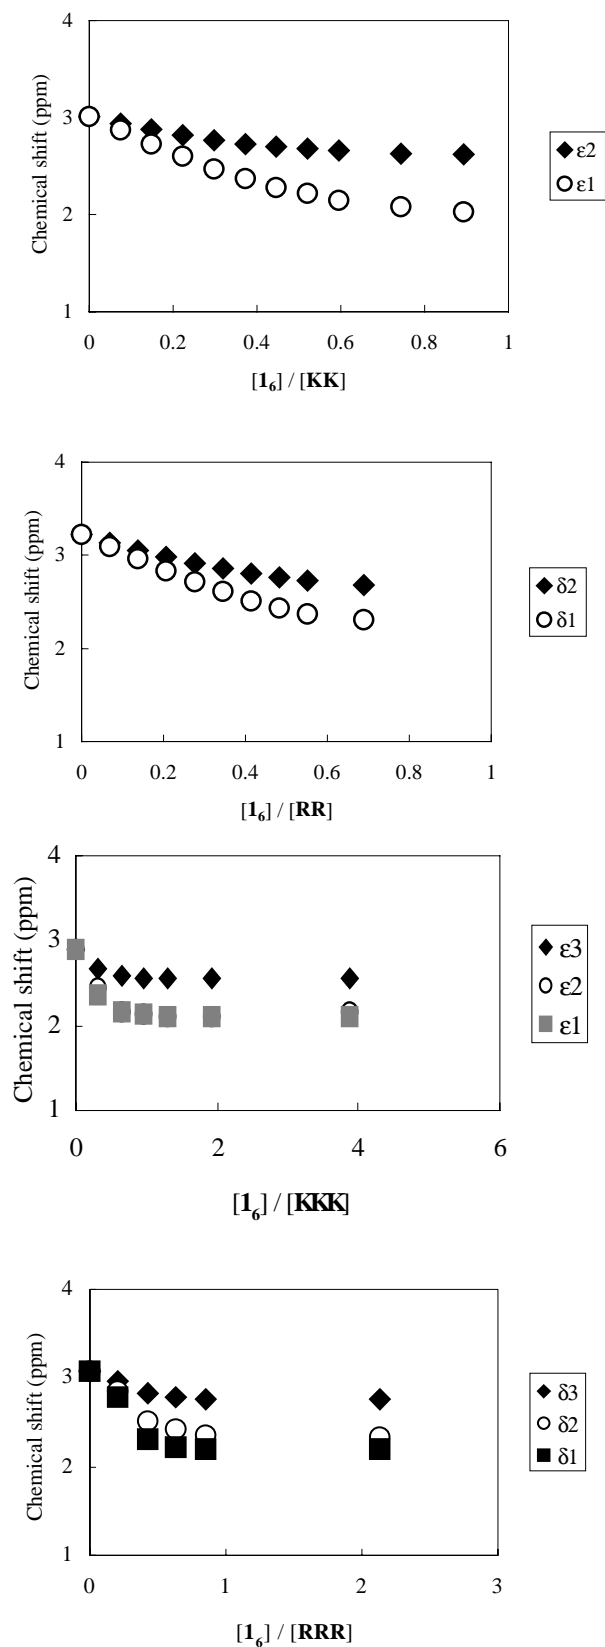

Chemical shifts experienced by the lysine protons of **KK** or **KKK** and by the arginine protons of **RR** or **RRR** in the presence of increasing amounts of **16**.

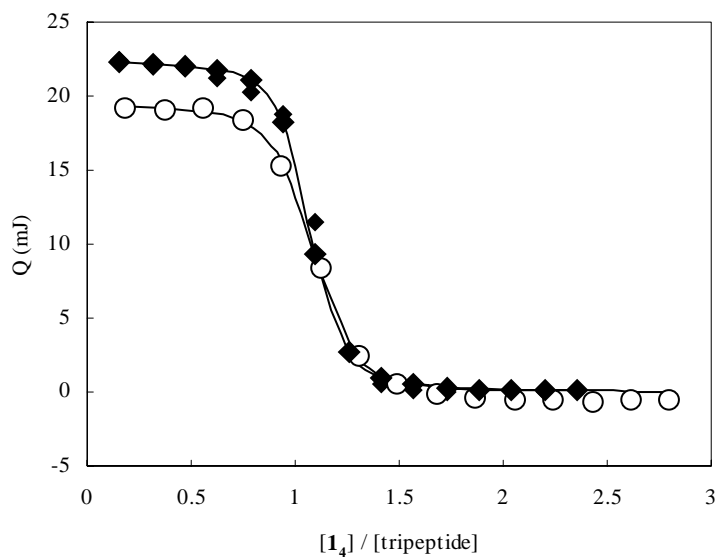

Heat effects observed upon titration of **1**<sub>4</sub> by **KKK** (○) and by **RRR** (◆).

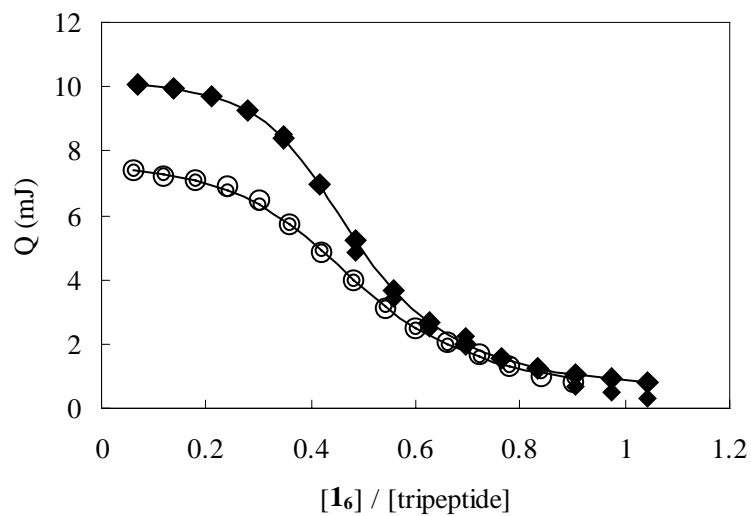

Heat effects observed upon titration of **1**<sub>6</sub> by **KKK** (○) and by **RRR** (◆).

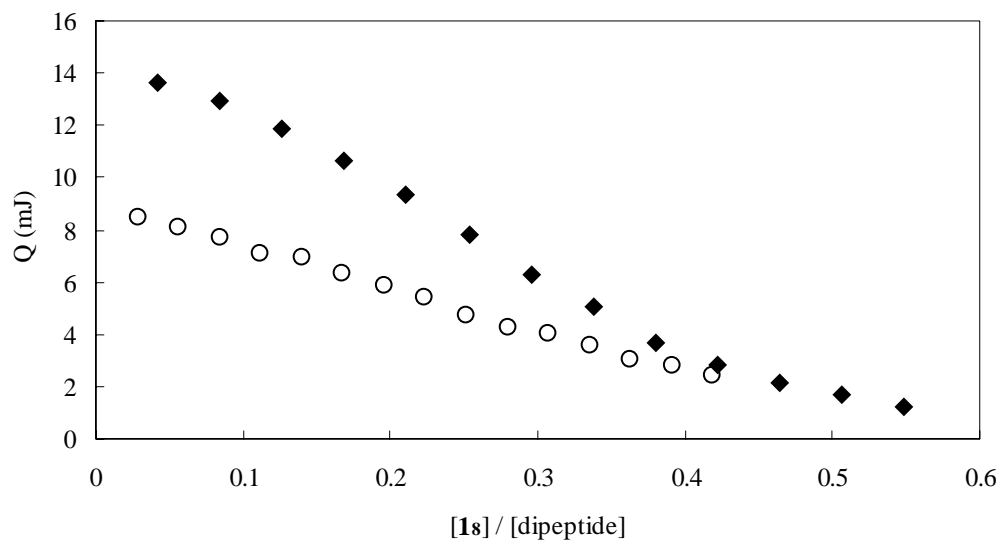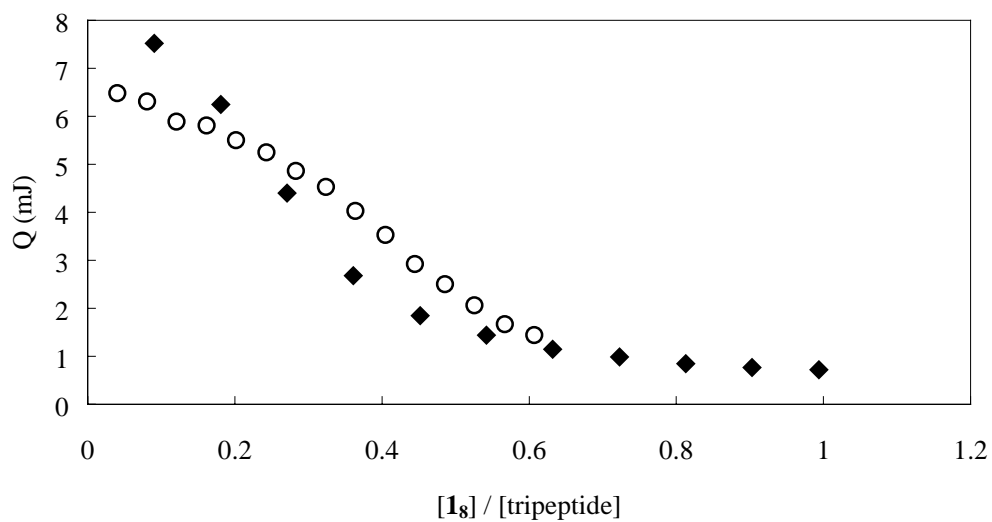

Heat effects observed upon titration of **1<sub>8</sub>** by **KK** or **KKK** (○) and by **RR** or **RRR** (◆)

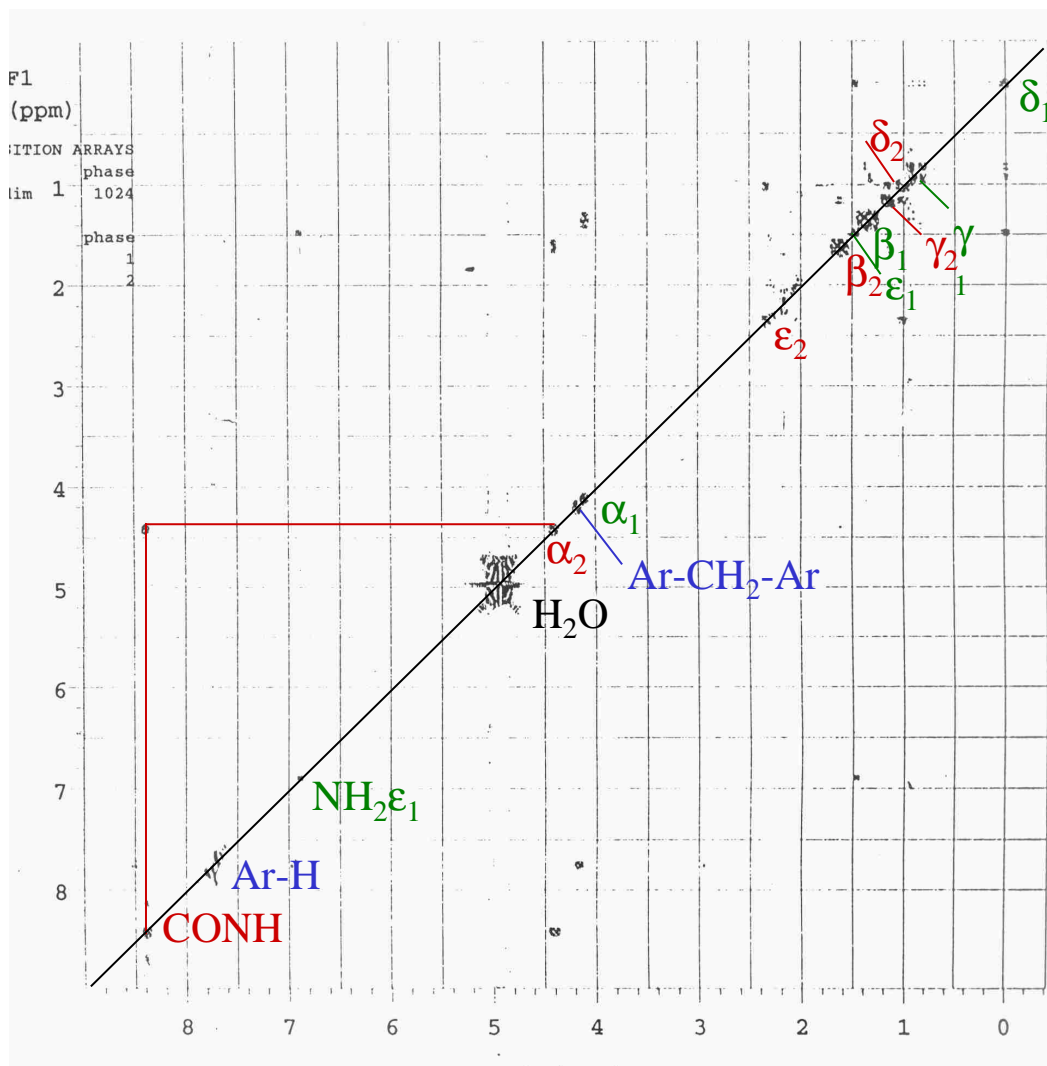

COSY 2D <sup>1</sup>H NMR spectra for **14** complexed with **KK**



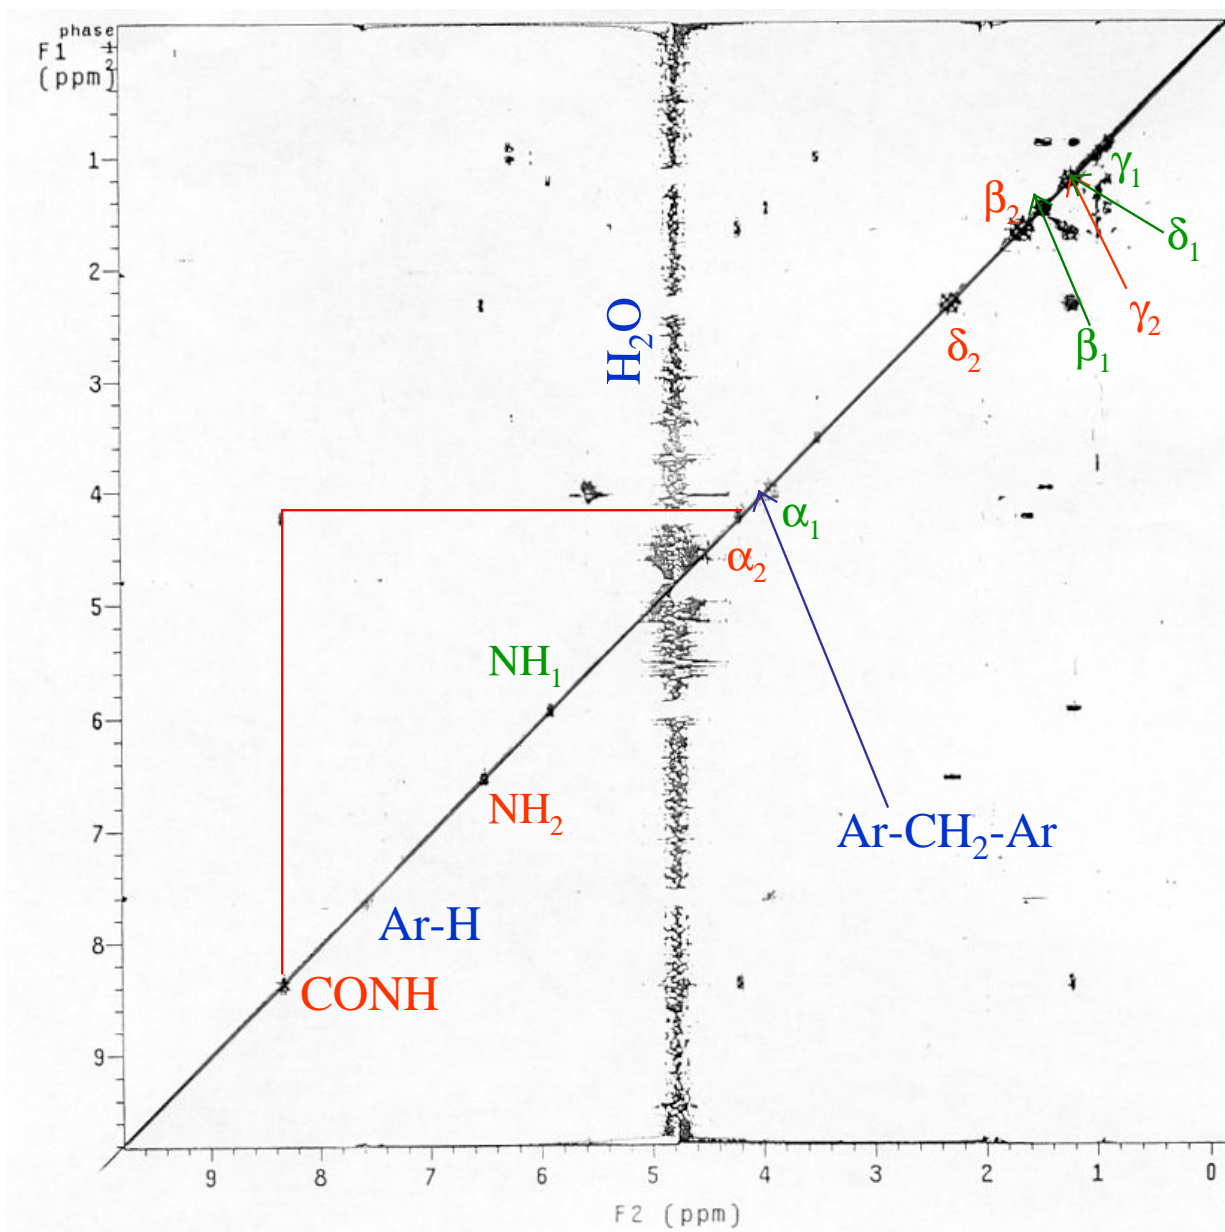

COSY 2D <sup>1</sup>H NMR spectra for **14** complexed with **RR**.

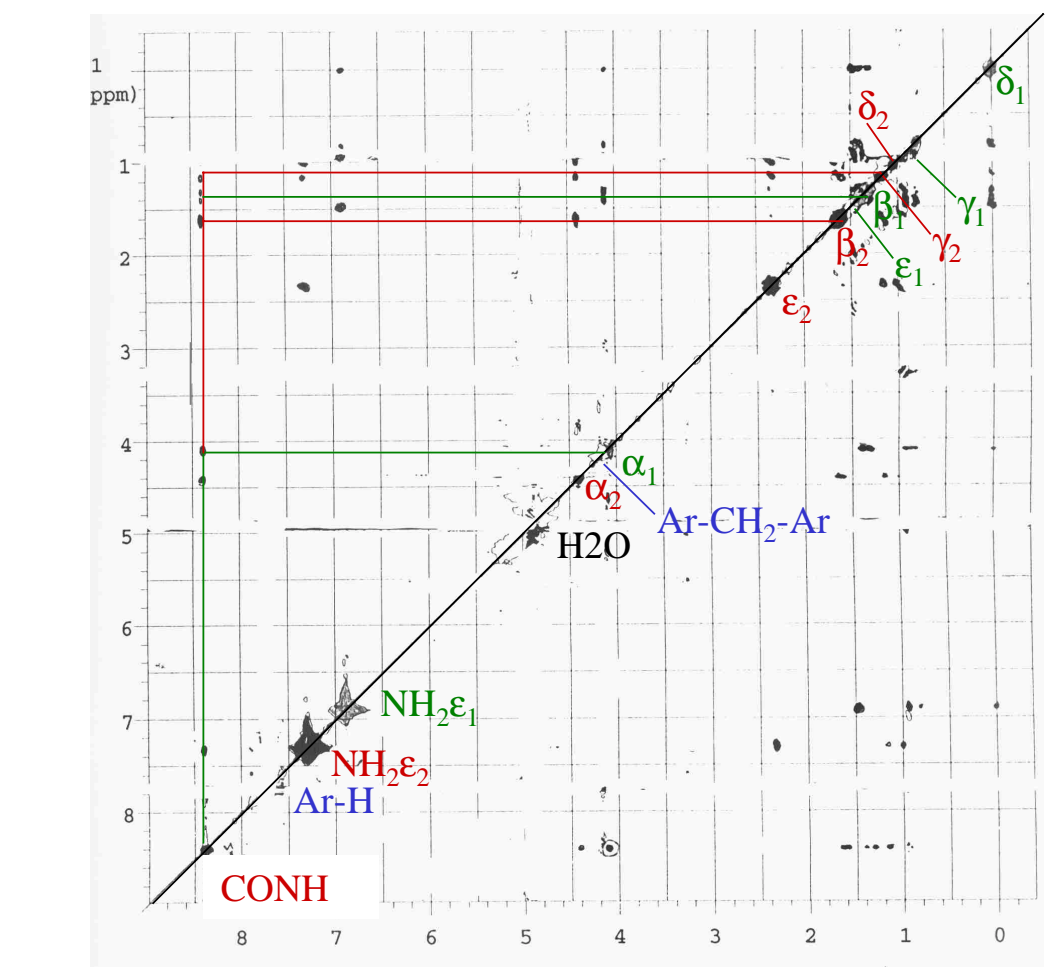

ROESY 2D  $^1\text{H}$  NMR spectra for **14** complexed with **KK**.
